# Supplementary material for: In Vivo Evaluation of Fibroblast Growth Factor Receptor Inhibition in Mouse Xenograft Models of Gastrointestinal Stromal Tumor
Source: MDPI journal article supplement (doi:10.3390/biomedicines10051135), 2022-05-13
Supplement: s1 [file s1]

**Supplementary Table S1:** Animals lost during experiment.

| <b>Model/passage</b> | <b>Treatment group</b> | <b>Day of experiment</b> | <b>Remark</b>                                  |
|----------------------|------------------------|--------------------------|------------------------------------------------|
| UZLX-GIST9p.4        | Imatinib               | 7                        | Tumor exceeding acceptable volume              |
|                      | Imatinib               | 10                       | Body weight loss (<80% of baseline)            |
|                      | Dovitinib              | 8                        | Abnormal tumor growth (into peritoneal cavity) |
|                      | Dovitinib              | 21                       | Found dead, body weight loss (>80%)            |
| UZLX-GIST2p.17       | Binimetinib            | 13                       | Body weight loss (<80% of baseline)            |
|                      | Binimetinib            | 20                       | Body weight loss (<80% of baseline)            |
| GIST48               | Control                | 3                        | Body weight loss (<80% of baseline)            |
|                      | Imatinib               | 13                       | Body weight loss (<80% of baseline)            |
